# Supplementary material
Source: publisher figshare collection journal article supplement (https://acs.figshare.com/ndownloader/files/5735421)
Supplement: Supplementary file 1 [file 5735421]

## Supplementary Information

### Optimisation of the eco-friendly extraction of bioactive monomeric phenolics and useful flavour precursors from grape waste

Rebecca E. Jelley <sup>a</sup>, Mandy Herbst-Johnstone <sup>a</sup>, Steffen Klaere <sup>b</sup>, Lisa I. Pilkington <sup>a</sup>, Claire Grose <sup>c</sup>, Damian Martin <sup>c</sup>, David Barker <sup>a,d,\*</sup>, Bruno Fedrizzi <sup>a,d,\*</sup>

<sup>a</sup> School of Chemical Sciences, University of Auckland, Private Bag 92019, Auckland, New Zealand

<sup>b</sup> Department of Statistics, University of Auckland, Private Bag 92019, Auckland, New Zealand

<sup>c</sup> The New Zealand Institute for Plant & Food Research Limited, Marlborough, PO Box 845, Blenheim, New Zealand

<sup>d</sup> Centre for Green Chemical Science, School of Chemical Sciences, University of Auckland, Private Bag 92019, Auckland, New Zealand

\* Authors to whom correspondence should be addressed

Tel: + 64 9 9238473

Fax: + 64 9 3737422

E-mail: d.barker@auckland.ac.nz (DB); b.fedrizzi@auckland.ac.nz (BF)

#### Contents:

Figure S1.....S2

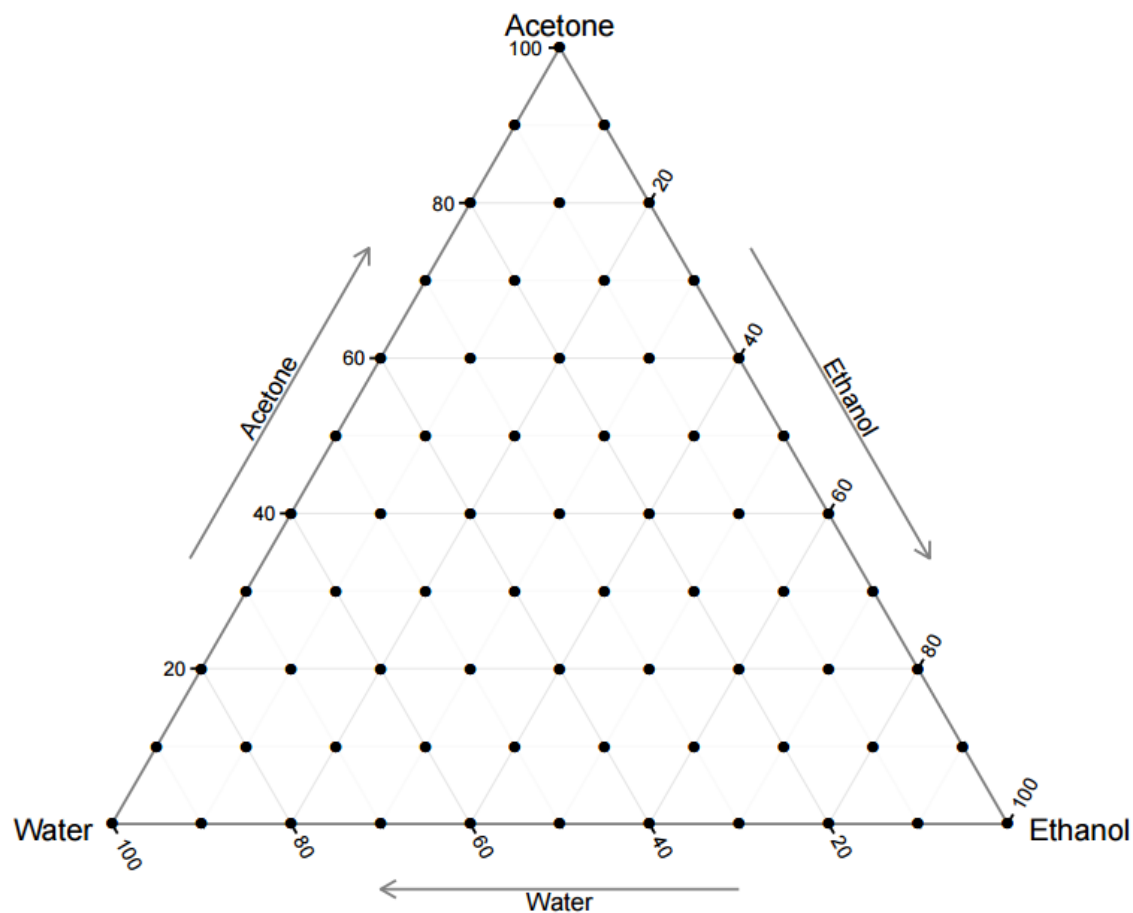

**Figure S1:** Representation of the various combinations of the solvents acetone, water, and ethanol that were investigated; the proportion of each solvent in a particular mix ranged from 0% to 100%. Increments of 10% were used to uniformly cover the entire spectrum of solvent combinations giving a total of 66 solvent profiles.
